# Supplementary material for: Multiple Introductions and Predominance of Rotavirus Group A Genotype G3P[8] in Kilifi, Coastal Kenya, 4 Years after Nationwide Vaccine Introduction
Source: Pathogens. 2020 Nov 24;9(12):981. doi: 10.3390/pathogens9120981 (PMC7761311; doi:10.3390/pathogens9120981)
Supplement: Supplementary file 1 [file pathogens-09-00981-s001.pdf]

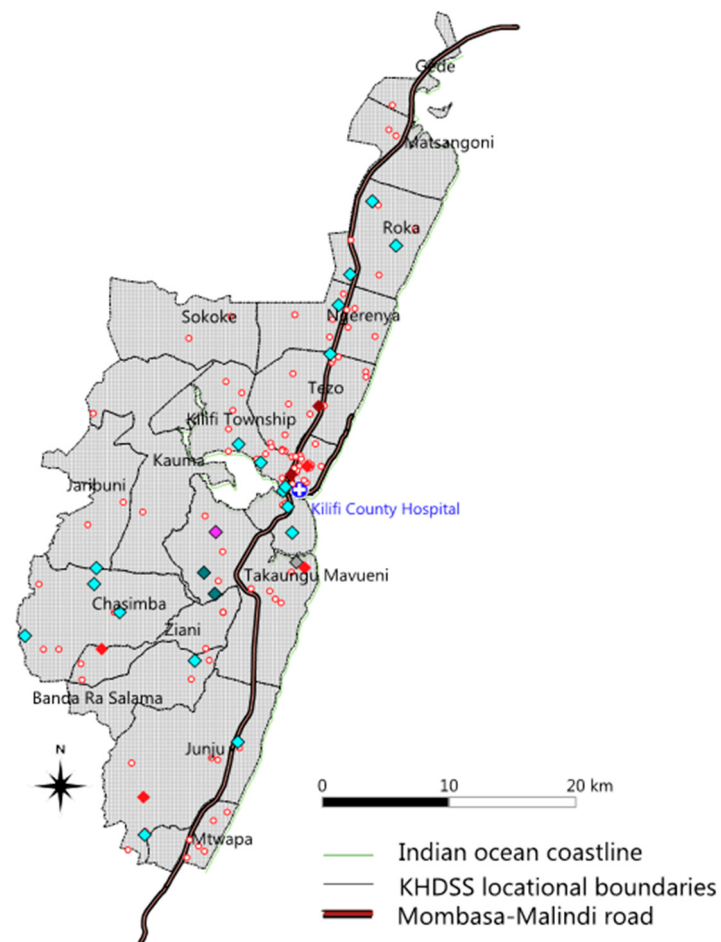

**Figure S1.** Geographic origin distribution of sampled children who presented with diarrhea symptoms at KCH and were KHDSS residents. The diamonds indicate RVA positives and are colored by genetic cluster (see Figure 3 for details). The red empty circles indicate RVA negative cases.

**Table S1:** The global distribution of the identified G3 global genetic clusters

| Global cluster name | Number of sequences | Includes Kilifi cluster | Years detected                     | Countries detected                                                                                                        |
|---------------------|---------------------|-------------------------|------------------------------------|---------------------------------------------------------------------------------------------------------------------------|
| Global/Clu_1        | 181                 | Clu_4/G3P[8]            | 2013, 2014, 2015, 2016, 2017, 2018 | Australia, Taiwan, Japan, Indonesia, Thailand, USA, Dominican, Brazil, Italy, Germany, Hungary, Spain, Kenya              |
| Global/Clu_2        | 116                 | Clu_3/G3P[8]            | 2013, 2014, 2015, 2016, 2018       | India, Pakistan, China, Taiwan, Korea, Japan, Singapore, Australia, Italy, Spain, Russia, USA, Dominican, Ethiopia, Kenya |
| Global/Clu_3        | 47                  | Clu_5/G3P[8]            | 2013, 2014, 2016, 2017, 2018       | Ethiopia, Kenya, Nigeria, Uganda, Indonesia                                                                               |
| Global/Clu_4        | 3                   | -                       | 2014                               | Peru                                                                                                                      |
| Global/Clu_5        | 1                   | -                       | 2014                               | China                                                                                                                     |
| Global/Clu_6        | 10                  |                         | 2015, 2016, 2018                   | Kenya, Pakistan, Indonesia                                                                                                |
| Global/Clu_7        | 1                   | -                       | 2016                               | Indonesia                                                                                                                 |
| Global/Clu_8        | 2                   | -                       | 2013, 2016                         | Kenya, China                                                                                                              |
| Global/Clu_9        | 1                   | -                       | 2016                               | Kuwait                                                                                                                    |
| Global/Clu_10       | 2                   | -                       | 2013, 2014                         | Belarus                                                                                                                   |
| Global/Clu_11       | 2                   |                         | 2013, 2015                         | Kenya                                                                                                                     |
| Global/Clu_12       | 1                   | -                       | 2013                               | Nigeria                                                                                                                   |
| Global/Clu_13       | 1                   | -                       | 2015                               | Thailand                                                                                                                  |
| Global/Clu_14       | 1                   | -                       | 2016                               | Thailand                                                                                                                  |
| Global/Clu_15       | 1                   | -                       | 2016                               | Thailand                                                                                                                  |
| Global/Clu_16       | 2                   | -                       | 2014, 2016                         | Viet Nam, Korea                                                                                                           |
| Global/Clu_17       | 1                   | -                       | 2013                               | China                                                                                                                     |
| Global/Clu_18       | 2                   | -                       | 2015, 2016                         | Indonesia                                                                                                                 |
